# Supplementary material
Source: publisher figshare collection journal article supplement (https://gsapubs.figshare.com/ndownloader/files/22743497)
Supplement: Supplementary file 1 [file 22743497]

Table DR1. Oxygen isotope compositions of authigenic K-feldspar and quartz in the Mt. Simon Sandstone.  
 Very well-developed = >5 vol%; well-developed = 2-5%; moderately developed = <2%

| Sample ID and Depth             | Sample Description                                                                                                                                                                       | $\delta^{18}\text{O}$ Ksp (‰)                                                | Average (‰) $\pm$ Standard Deviation (‰) | $\delta^{18}\text{O}$ Qtz (‰)        | Average (‰) $\pm$ Standard Deviation (‰) |
|---------------------------------|------------------------------------------------------------------------------------------------------------------------------------------------------------------------------------------|------------------------------------------------------------------------------|------------------------------------------|--------------------------------------|------------------------------------------|
| CMS-1 Outcrop                   | 1 m above the contact with Middle Proterozoic granite/gneiss; high porosity (~20%); poorly sorted subarkose; K-feldspar overgrowths well developed; moderate quartz overgrowths          | 24.1<br>23.8<br>24.4<br>20.5<br>23.5                                         | $23.3 \pm 1.4$                           |                                      |                                          |
| CMS-3 Outcrop                   | 6 m above the contact with a Middle Proterozoic tonalite; high porosity (~20%); well sorted fine-grained arkosic arenite; K-feldspar overgrowths very well developed                     | 20.1<br>23.1<br>22.7<br>26.4<br>24.6<br>25.6                                 | $23.8 \pm 2.1$                           |                                      |                                          |
| C12996 (UPH-3) 655 m            | Coarse grained, well-sorted quartz arenite and subarkose; ~15% porosity; moderate K-feldspar overgrowths; well developed quartz overgrowths                                              | 26.2<br>20.2<br>26.2<br>18.5<br>22.2<br>20.1<br>19.5<br>17.2<br>22.2<br>23.3 | $21.6 \pm 2.9$                           | 26.2<br>26.2<br>29.3<br>29.7<br>26.2 | $27.5 \pm 1.6$                           |
| C3707 457 m                     | Fine-grained, well sorted subarkose with small clay veinlets (up to 2 mm in width); high porosity (~30%); K-feldspar overgrowths well developed; moderately developed quartz overgrowths | 22.5<br>19.9<br>23.2<br>26.5<br>23.6<br>20.4<br>18.2                         | $22.0 \pm 2.8$                           |                                      |                                          |
| C675 1315 m                     | Medium-grained, moderately sorted subarkose and quartz arenite micro-interbedding; 10% porosity; K-feldspar overgrowths well developed; moderate quartz overgrowths                      | 20.0<br>20.1<br>23.3<br>17.3<br>18.3<br>20.4                                 | $19.9 \pm 2.1$                           |                                      |                                          |
| C437 889 m – Ksp<br>872 m – Qtz | Fine-grained, moderately sorted subarkose; 15% porosity; K-feldspar and quartz moderately developed                                                                                      | 26.5<br>21.2<br>22.9<br>22.0<br>17.4                                         | $22.0 \pm 3.3$                           |                                      |                                          |
| C7466 794 m                     | Moderately sorted, very fine, medium grained quartz arenite; 15% porosity; K-feldspar and quartz overgrowths moderately developed                                                        | 19.5<br>22.4<br>18.8<br>16.8<br>16.0                                         | $18.7 \pm 2.5$                           |                                      |                                          |

|                                       |                                                                                                                                                      |                                                      |                |                                                              |                |
|---------------------------------------|------------------------------------------------------------------------------------------------------------------------------------------------------|------------------------------------------------------|----------------|--------------------------------------------------------------|----------------|
| C3904<br>1003 m                       | Fine-grained; well sorted subarkose; 10% porosity; K-feldspar overgrowths well developed, moderate quartz overgrowths                                | 23.5<br>20.5<br>19.7<br>17.5<br>15.2<br>18.2<br>18.9 | $19.1 \pm 2.6$ |                                                              |                |
| BR-1<br>1188 m – Ksp<br>1136 m – Qtz  | Coarse-grained quartz arenite with small amount of K-feldspar; 10% porosity; very well developed quartz overgrowths; moderate K-feldspar overgrowths | 19.2<br>17.2<br>18.0<br>16.1<br>13.6<br>18.9<br>16.0 | $17.0 \pm 2.0$ | 22.7<br>24.1<br>23.0<br>26.2<br>20.4<br>22.0<br>25.5<br>22.2 | $23.3 \pm 1.8$ |
| C8948<br>1569 m – Ksp<br>1571 m – Qtz | Medium- to fine-grained subarkose; 8% porosity; K-feldspar overgrowths well developed; moderate quartz overgrowths                                   | 12.7<br>13.8<br>14.9<br>13.5<br>13.1                 | $13.6 \pm 0.9$ | 21.5<br>20.0<br>25.2<br>21.6<br>19.7                         | $21.6 \pm 2.0$ |
| C4831<br>2581 m                       | Medium-grained, poorly-moderately sorted quartz arenite and subarkose; 2% porosity; moderate K-feldspar and quartz overgrowths                       | 17.7<br>18.0<br>16.3<br>14.6<br>17.7                 | $16.9 \pm 1.4$ |                                                              |                |
